# Supplementary material for: Salivary protein glycopatterns for natural regulation of oral microbiota
Source: Research Square preprint supplement (doi:10.21203/rs.3.rs-221122/v2), 2021-05-25
Supplement: Supplementary file 1 [file da7b8a84e24a4fbeba67e432.docx]

**Table S1. Descriptive data of healthy control subjects and patients in the study.**

|  | Healthy volunteer | Gastric cancer |
| --- | --- | --- |
| n | 12 | 12 |
| Age (Mean, SD) | 57.7±9.0 | 58.1±9.9 |
| Gender(M/F) | 7/5 | 7/5 |
| TNM-Stage (I/II/III/IV) |  | 2/5/3/0 |
